# Supplementary material for: Effective Diagnosis of Foot-And-Mouth Disease Virus (FMDV) Serotypes O and A Based on Optical and Electrochemical Dual-Modal Detection
Source: MDPI journal article supplement (doi:10.3390/biom11060841), 2021-06-05
Supplement: s1 [file s1]

## *Supplementary information*

# **Effective diagnosis of foot-and-mouth disease virus (FMDV) serotypes O and A based on optical and electrochemical du-al-modal detection**

**Yun-Jung Hwang<sup>1,2</sup>, Kyung-Kwan Lee<sup>1,3,4</sup>, Jong-Won Kim<sup>1,4</sup>, Kwang-Hyo Chung<sup>4</sup>, Sang-Jick Kim<sup>5</sup>, Wan Soo Yun<sup>2,\*</sup>, Chang-Soo Lee<sup>1,4,6,\*</sup>**

<sup>1</sup> Bionanotechnology Research Center, Korea Research Institute of Bioscience and Biotechnology (KRIBB), Daejeon 34141, Korea; yunjung1758@gmail.com (Y.-J.H.); lkk@kribb.re.kr (K.-K.L.); kimjw@kribb.re.kr (J.-W.K.)

<sup>2</sup> Department of Chemistry, Sungkyunkwan University, Suwon 16419, Korea; wsyun87@skku.edu

<sup>3</sup> Department of Biomedical and Nanopharmaceutical Science, College of Pharmacy, Kyung Hee University, Seoul 02447, Korea

<sup>4</sup> Dignostics Platform Research Section, Electronics and Telecommunications Research Institute (ETRI), Daejeon 34129, Korea; hyo@etri.re.kr (K.-H.C.)

<sup>5</sup> Synthetic Biology and Bioengineering Research Center, Korea Research Institute of Bioscience and Biotechnology (KRIBB), Daejeon 34141, Korea; sjick@kribb.re.kr (S.-J.K.)

<sup>6</sup> Department of Biotechnology, University of Science & Technology (UST), Daejeon 34113, Korea

\* Correspondence: cslee@kribb.re.kr (C.-S.L.); Tel.: +82-42-879-8446; wsyun87@skku.edu (W.S.Y.); Tel.: +82-31-299-4568

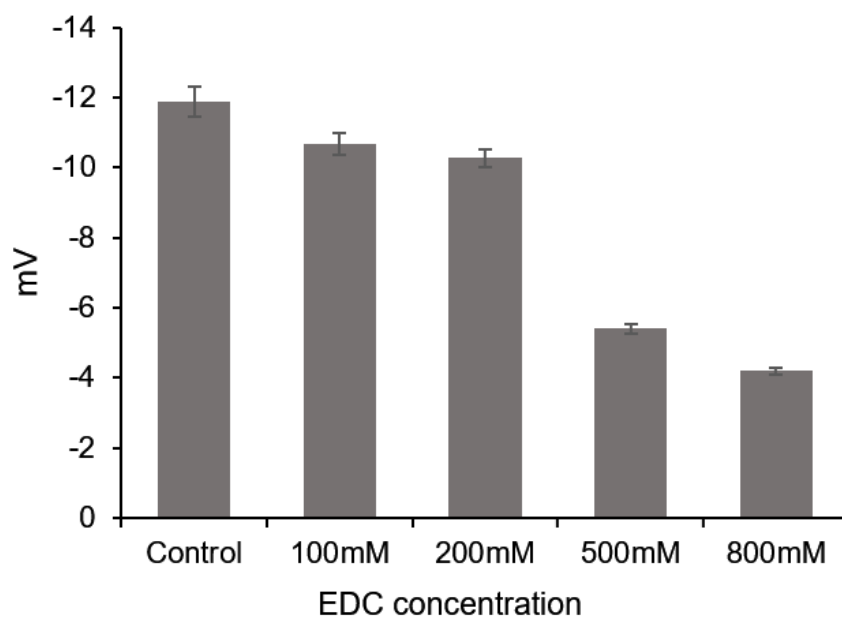

**Figure S1.** Effect of EDC activation assisted by NHS on the zeta potential of carboxylated MNPs.

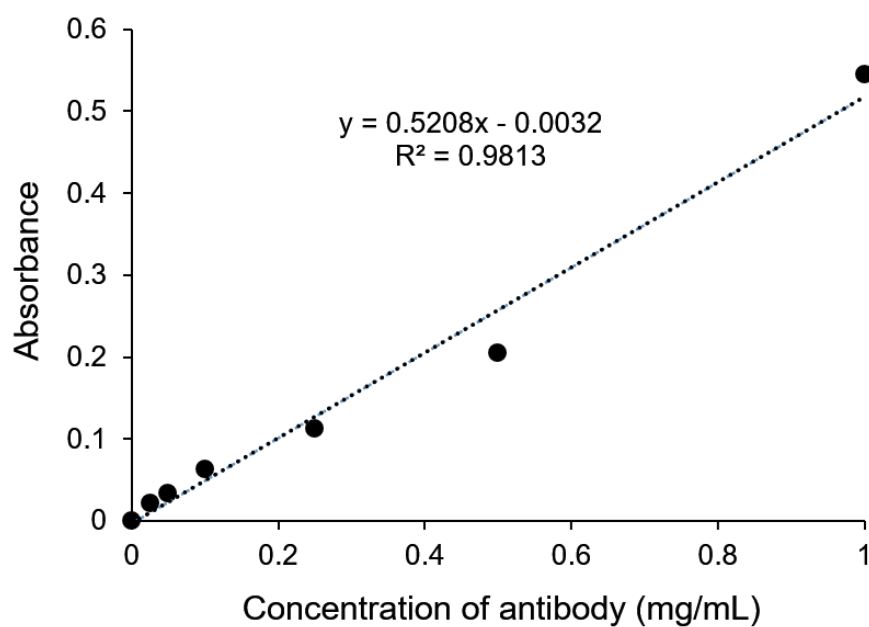

**Figure S2.** Calibration curve by the Bradford assay measured at 595 nm wavelength.

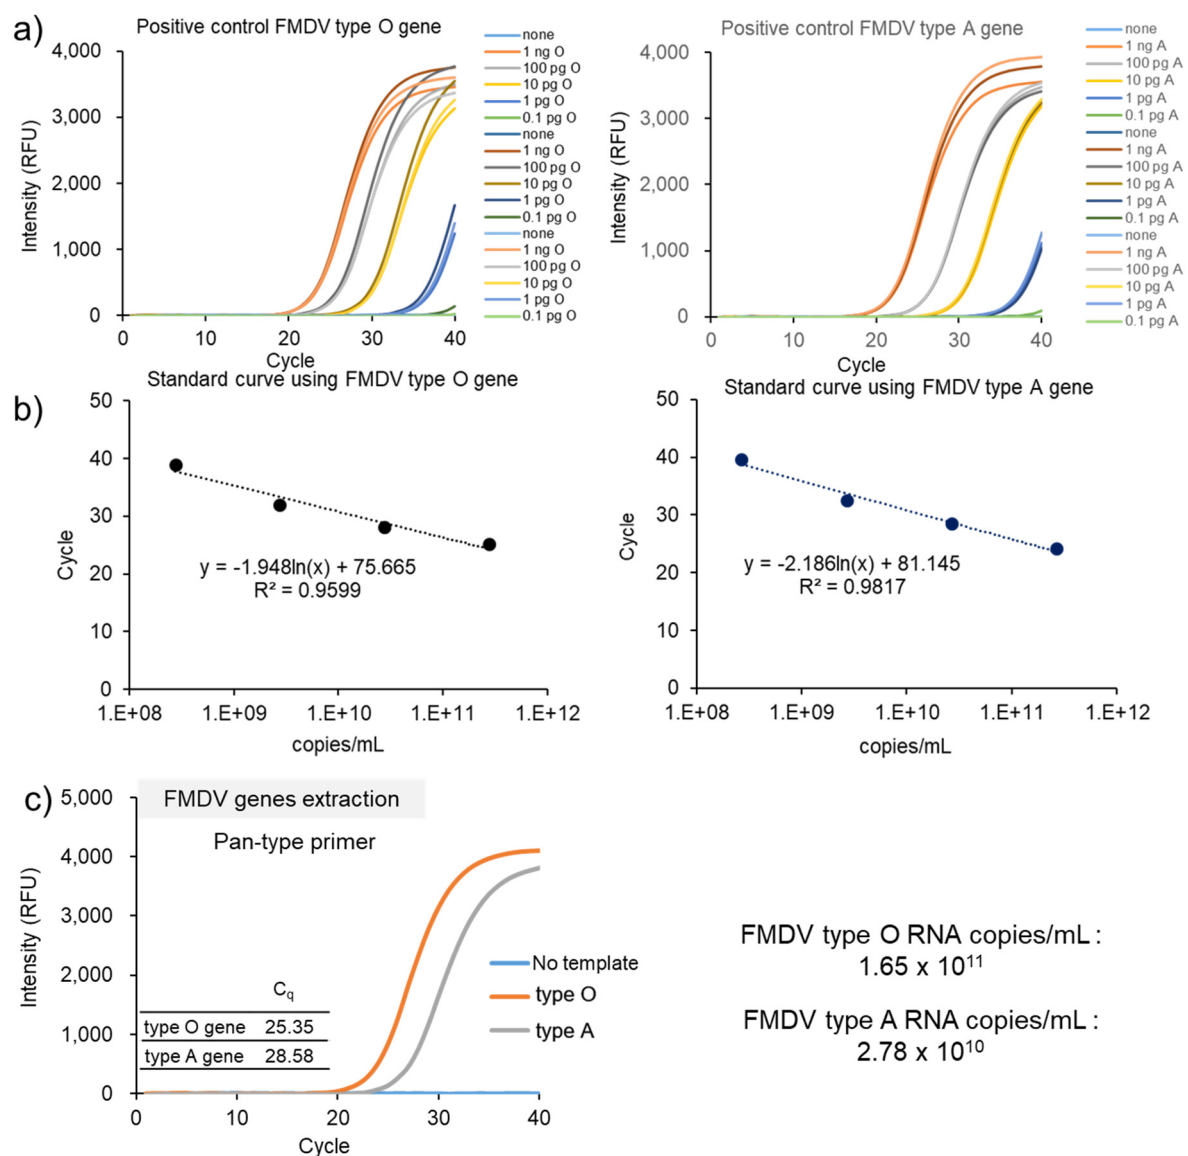

**Figure S3.** Calibration curve by Bradford assay measured at 595 nm wavelength. The process of obtaining FMDV concentration. (a) FMDV gene RT-qPCR results, (b) standard curve results according to FMDV gene RT-qPCR, (c) FMDV concentration results obtained by standard curve through extracted FMDV RNA.

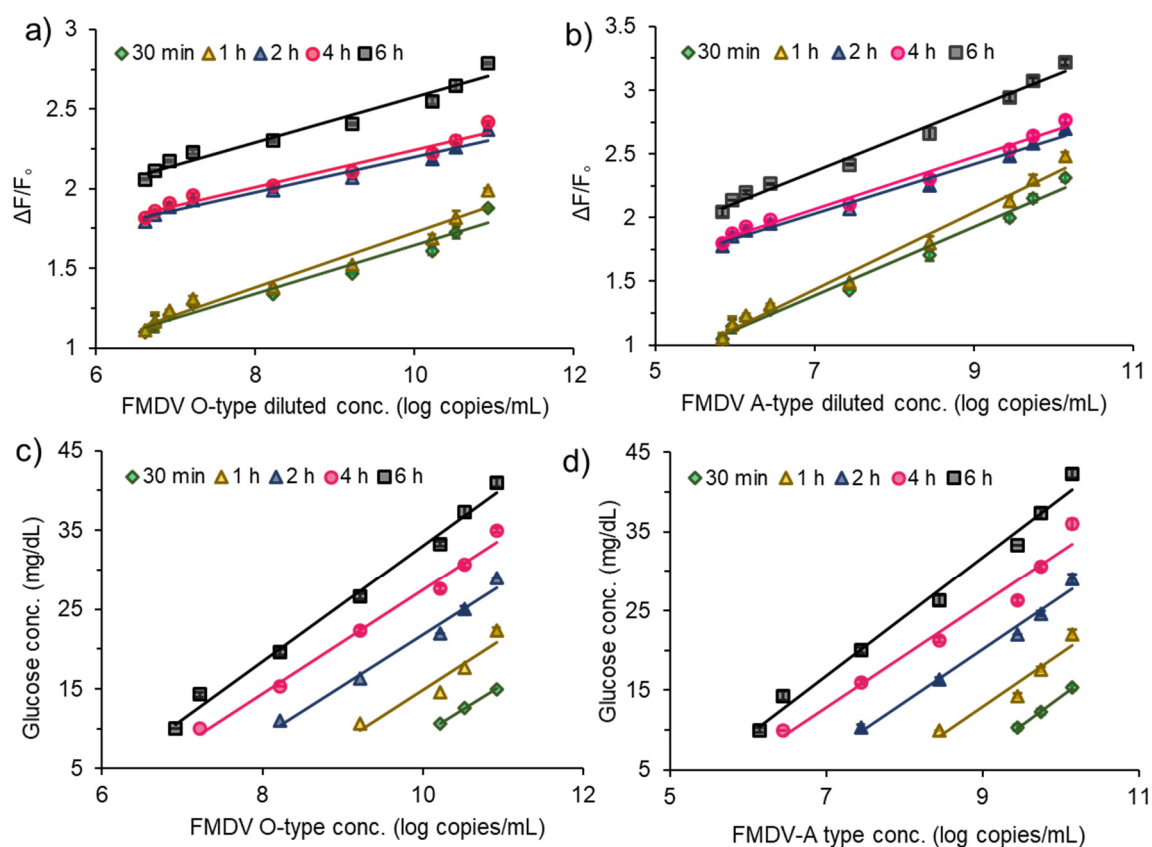

**Figure S4.** Sensitivity test by the time of the optical and electrochemical multimodal detection of FMDV serotype O and A. (a) The fluorescence measurement result of FMDV serotype O by time, (b) The fluorescence measurement result of FMDV serotype A by time, (c) The electrochemical measurement result of FMDV serotype O using glucometer by time, (d) The electrochemical measurement result of FMDV serotype A using glucometer by time.

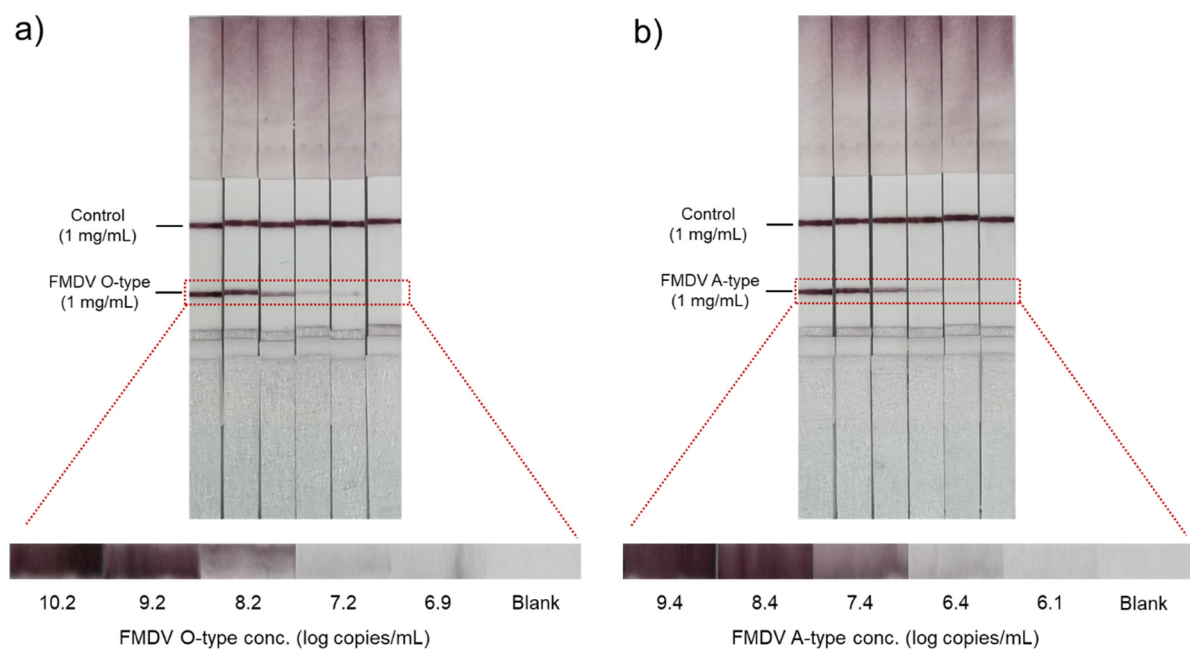

**Figure S5.** Sensitivity for FMDV O- and A-type using LFA kit. Results were quantified using Image J program. (a) LFA result for FMDV O-type, (b) LFA result for FMDV A-type.
